# Supplementary material
Source: PubMed Central journal article supplement (PMC11003766)
Supplement: NIHMS1970352-supplement-Supplementary_Figure_1.pdf [file NIHMS1970352-supplement-Supplementary_Figure_1.pdf]

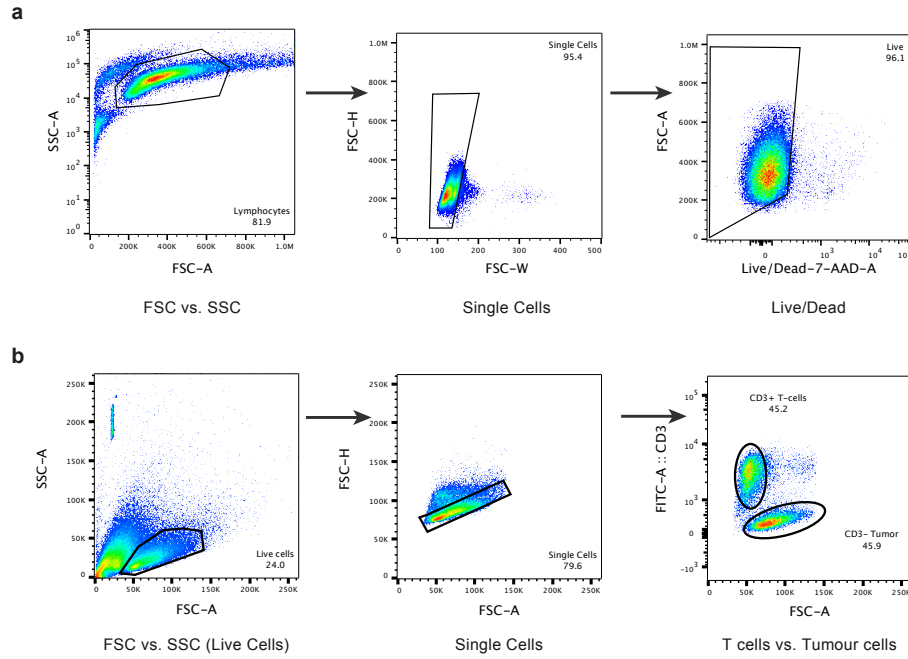

**Supplementary Figure 1. Flow cytometry gating strategies. (a)** General gating strategy for analysing Daudi cells. **(b)** Gating strategy for analysing co-culture assays with TEG cells and patient-derived cancer organoid cells.
