# Supplementary material
Source: PubMed Central journal article supplement (PMC11003766)
Supplement: NIHMS1970352-supplement-Supplementary_Information_Guide.pdf [file NIHMS1970352-supplement-Supplementary_Information_Guide.pdf]

**Supplementary Information for  
“CRISPR screens decode cancer cell pathways that trigger  $\gamma\delta$  T cell detection”**

**Supplementary Figure 1. Flow Cytometry Gating Strategies.**
